# Supplementary material
Source: publisher site journal article supplement (https://www.dovepress.com/article/594021)

**Appendix:** **Nicotine Metabolism and Chronic Obstructive Pulmonary Disease: Mendelian randomization and phenotypic characterization analysis**

**Supplementary Table 1.** Two-sample Mendelian randomization instrument variables for FINN_COPD........................................................................................................... 3

**Supplementary Table 2.** Two-sample Mendelian randomization instrument variables for MVP_COPD............................................................................................................ 5

**Supplementary Table 3.** Egger regression and MR-PRESSO analyses for horizontal pleiotropy....................................................................................................................... 7

**Supplementary Table 4.** Details of the reverse Mendelian Randomization (MR).......8

**Supplementary Table 5.** Egger regression and MR-PRESSO analyses for horizontal pleiotropy for Early-and Later-Onset COPD.................................................................8

**Supplementary Table 6.** Stratified Mendelian Randomization Estimates for Early- and Later-Onset COPD............................................................................................... 9

**Supplementary Table 7.** Results of colocalization analysis showing evidence for shared causal variants (PPH₄) in the main analysis..................................................... 10

**Supplementary Figure 1.** Mendelian randomization scatter plots of SNP-specific associations with NMR and COPD……………………............................................. 11

**Supplementary Figure 2.** Forest plot of single-nucleotide polymorphisms (SNPs) associated with NMR and risk of FINN_COPD......................................................... 12

**Supplementary Figure 3.** Forest plot of single-nucleotide polymorphisms (SNPs) associated with NMR and risk of MVP_COPD.......................................................... 12

**Supplementary Figure 4.** Leave-one-out analysis plot of inverse-variance weighted two-sample Mendelian randomization between NMR and FINN_COPD.................. 13

**Supplementary Figure 5.** Leave-one-out analysis plot of inverse-variance weighted two-sample Mendelian randomization between NMR and MVP_COPD................... 13

**Supplementary Figure 6.** Funnel plot from single SNP analysis of the two-sample MR............................................................................................................................... 14

**Supplementary Figure 7.** Colocalization analysis of NMR and COPD……........... 14

**Supplementary Figure 8.** Trends in COPD prevalence across equivalent levels of smoking exposure by nicotine metabolism phenotype…………………….…........... 15

**Supplementary Table 1.** Two-sample Mendelian randomization instrument variables for FINN_COPD

| SNP | effect_allele | other_allele | EAF | SE | P | F |
| --- | --- | --- | --- | --- | --- | --- |
| rs10408639 | G | A | 0.945521 | 0.04525 | 4.7e-08 | 31 |
| rs1042389 | C | T | 0.213763 | 0.024473 | 1.25e-08 | 32 |
| rs10425738 | A | G | 0.733445 | 0.022267 | 2.79e-50 | 219 |
| rs112292570 | T | A | 0.021651 | 0.069676 | 2.42e-53 | 249 |
| rs112298060 | C | T | 0.050106 | 0.066057 | 7.77e-09 | 68 |
| rs112298484 | G | A | 0.01738 | 0.07883 | 7.57e-19 | 83 |
| rs11538385 | T | C | 0.248017 | 0.022779 | 5.41e-23 | 93 |
| rs11667982 | A | G | 0.15805 | 0.028224 | 3.27e-12 | 51 |
| rs11672825 | G | T | 0.451918 | 0.020408 | 3.87e-08 | 31 |
| rs11673605 | A | G | 0.119934 | 0.030212 | 1.78e-16 | 65 |
| rs117284921 | C | T | 0.03577 | 0.054341 | 3.66e-16 | 67 |
| rs117398851 | A | G | 0.01741 | 0.105556 | 8.5e-12 | 88 |
| rs118038652 | C | T | 0.050229 | 0.044011 | 1.7e-25 | 100 |
| rs11881522 | A | G | 0.025432 | 0.066956 | 1.02e-08 | 36 |
| rs12976199 | A | C | 0.235391 | 0.023634 | 6.1e-11 | 42 |
| rs13115399 | T | C | 0.294029 | 0.027519 | 7.94e-09 | 52 |
| rs138807235 | T | C | 0.069963 | 0.055346 | 1.59e-09 | 72 |
| rs141250326 | A | G | 0.033467 | 0.068343 | 2.55e-09 | 52 |
| rs143353161 | T | C | 0.054728 | 0.062457 | 1.21e-09 | 73 |
| rs143483572 | T | C | 0.01907 | 0.116153 | 2.85e-11 | 111 |
| rs144074015 | T | C | 0.021744 | 0.08346 | 2.41e-08 | 45 |
| rs145384113 | T | C | 0.019641 | 0.094517 | 1.45e-08 | 54 |
| rs147915270 | C | A | 0.05323 | 0.054072 | 8.62e-12 | 68 |
| rs148103807 | T | C | 0.031348 | 0.059319 | 9.57e-11 | 44 |
| rs149293272 | A | G | 0.069591 | 0.040275 | 2.59e-09 | 36 |
| rs149812270 | C | A | 0.022827 | 0.066099 | 2.08e-37 | 160 |
| rs1645678 | G | A | 0.739326 | 0.023567 | 1.79e-09 | 38 |
| rs17726493 | T | C | 0.161841 | 0.0276 | 8.22e-19 | 80 |
| rs190003323 | A | T | 0.01689 | 0.076272 | 4.47e-09 | 32 |
| rs191070943 | T | C | 0.058102 | 0.060189 | 3.07e-11 | 87 |
| rs2042936 | A | G | 0.370021 | 0.020346 | 9.76e-47 | 201 |
| rs2075304 | G | C | 0.118286 | 0.032313 | 1.77e-09 | 38 |
| rs234368 | G | T | 0.438954 | 0.024079 | 6.92e-12 | 66 |
| rs2561537 | G | A | 0.528694 | 0.019734 | 5.28e-20 | 80 |
| rs2604905 | C | A | 0.059254 | 0.041753 | 3.29e-11 | 42 |
| rs3181842 | T | C | 0.601612 | 0.020665 | 7.97e-35 | 156 |
| rs34638591 | C | T | 0.570088 | 0.02457 | 1.26e-12 | 74 |
| rs34801664 | T | C | 0.138926 | 0.045959 | 1.66e-08 | 80 |
| rs36012476 | C | G | 0.045018 | 0.047831 | 7.26e-16 | 63 |
| rs3760923 | C | T | 0.15179 | 0.027407 | 3.98e-08 | 28 |
| rs3844449 | C | T | 0.830212 | 0.026735 | 6.9e-34 | 149 |
| rs4802082 | T | C | 0.046961 | 0.046837 | 2.62e-27 | 115 |
| rs4803356 | G | C | 0.057548 | 0.042994 | 2.62e-33 | 146 |
| rs4803408 | T | C | 0.016753 | 0.087059 | 9.55e-13 | 63 |
| rs530366 | G | A | 0.170702 | 0.026673 | 2.27e-10 | 40 |
| rs55978439 | A | T | 0.208258 | 0.024937 | 6.62e-57 | 266 |
| rs56113850 | C | T | 0.552548 | 0.019773 | 5.54e-261 | 1457 |
| rs56185718 | C | T | 0.267062 | 0.022731 | 6.57e-36 | 159 |
| rs62107913 | T | C | 0.220432 | 0.023608 | 6.59e-23 | 92 |
| rs62117431 | G | A | 0.072323 | 0.055831 | 7.26e-11 | 88 |
| rs6413474 | C | T | 0.021795 | 0.082359 | 9.81e-16 | 93 |
| rs68191109 | C | T | 0.395548 | 0.022225 | 1.88e-08 | 37 |
| rs71358941 | G | C | 0.045601 | 0.050249 | 3.71e-10 | 42 |
| rs7255817 | G | A | 0.452455 | 0.019702 | 1.31e-18 | 74 |
| rs7257854 | C | T | 0.379552 | 0.020238 | 2.02e-64 | 286 |
| rs73034456 | T | C | 0.089991 | 0.042532 | 1.63e-16 | 100 |
| rs73042681 | C | G | 0.020986 | 0.084931 | 4.52e-08 | 44 |
| rs73045487 | C | G | 0.169429 | 0.026378 | 4.38e-19 | 77 |
| rs73048936 | G | A | 0.039663 | 0.063135 | 2.28e-08 | 47 |
| rs74429191 | C | T | 0.048082 | 0.056616 | 7.58e-10 | 55 |
| rs74723889 | T | C | 0.028486 | 0.092862 | 1.74e-11 | 108 |
| rs7507400 | T | G | 0.356392 | 0.02981 | 8.95e-36 | 331 |
| rs75762823 | T | C | 0.053053 | 0.054094 | 1.31e-08 | 47 |
| rs78148277 | A | G | 0.027775 | 0.061826 | 1.12e-14 | 61 |
| rs7937 | T | C | 0.596432 | 0.019807 | 6.65e-82 | 363 |
| rs79436912 | G | A | 0.081885 | 0.03636 | 3.93e-21 | 88 |
| rs8107329 | T | C | 0.363641 | 0.021918 | 8.89e-27 | 127 |
| rs8113056 | A | G | 0.209292 | 0.024115 | 7.81e-37 | 156 |

**Supplementary Table 2.** Two-sample Mendelian randomization instrument variables for MVP_COPD

| SNP | effect_allele | other_allele | EAF | SE | P | F |
| --- | --- | --- | --- | --- | --- | --- |
| rs10408639 | G | A | 0.945521 | 0.04525 | 4.7e-08 | 31 |
| rs1042389 | C | T | 0.213763 | 0.024473 | 1.25e-08 | 32 |
| rs10425738 | A | G | 0.733445 | 0.022267 | 2.79e-50 | 219 |
| rs112292570 | T | A | 0.021651 | 0.069676 | 2.42e-53 | 249 |
| rs112298060 | C | T | 0.050106 | 0.066057 | 7.77e-09 | 68 |
| rs112298484 | G | A | 0.01738 | 0.07883 | 7.57e-19 | 83 |
| rs113421706 | G | A | 0.129579 | 0.030429 | 2.01e-12 | 51 |
| rs11538385 | T | C | 0.248017 | 0.022779 | 5.41e-23 | 94 |
| rs11667982 | A | G | 0.15805 | 0.028224 | 3.27e-12 | 51 |
| rs117284921 | C | T | 0.03577 | 0.054341 | 3.66e-16 | 67 |
| rs117398851 | A | G | 0.01741 | 0.105556 | 8.5e-12 | 88 |
| rs117824460 | G | A | 0.037001 | 0.067626 | 4.03e-52 | 396 |
| rs118038652 | C | T | 0.050229 | 0.044011 | 1.7e-25 | 100 |
| rs11881522 | A | G | 0.025432 | 0.066956 | 1.02e-08 | 36 |
| rs12151196 | G | A | 0.303326 | 0.02201 | 2.2e-45 | 208 |
| rs12976199 | A | C | 0.235391 | 0.023634 | 6.1e-11 | 42 |
| rs13115399 | T | C | 0.294029 | 0.027519 | 7.94e-09 | 52 |
| rs138807235 | T | C | 0.069963 | 0.055346 | 1.59e-09 | 72 |
| rs143353161 | T | C | 0.054728 | 0.062457 | 1.21e-09 | 74 |
| rs143483572 | T | C | 0.01907 | 0.116153 | 2.85e-11 | 111 |
| rs144074015 | T | C | 0.021744 | 0.08346 | 2.41e-08 | 45 |
| rs145384113 | T | C | 0.019641 | 0.094517 | 1.45e-08 | 55 |
| rs148103807 | T | C | 0.031348 | 0.059319 | 9.57e-11 | 44 |
| rs149293272 | A | G | 0.069591 | 0.040275 | 2.59e-09 | 36 |
| rs149812270 | C | A | 0.022827 | 0.066099 | 2.08e-37 | 160 |
| rs190003323 | A | T | 0.01689 | 0.076272 | 4.47e-09 | 33 |
| rs191070943 | T | C | 0.058102 | 0.060189 | 3.07e-11 | 87 |
| rs2042936 | A | G | 0.370021 | 0.020346 | 9.76e-47 | 202 |
| rs2075304 | G | C | 0.118286 | 0.032313 | 1.77e-09 | 39 |
| rs2561537 | G | A | 0.528694 | 0.019734 | 5.28e-20 | 81 |
| rs2604905 | C | A | 0.059254 | 0.041753 | 3.29e-11 | 42 |
| rs28399433 | C | A | 0.09386 | 0.033614 | 5.32e-96 | 441 |
| rs3181842 | T | C | 0.601612 | 0.020665 | 7.97e-35 | 156 |
| rs34638591 | C | T | 0.570088 | 0.02457 | 1.26e-12 | 74 |
| rs34801664 | T | C | 0.138926 | 0.045959 | 1.66e-08 | 80 |
| rs36012476 | C | G | 0.045018 | 0.047831 | 7.26e-16 | 63 |
| rs3844449 | C | T | 0.830212 | 0.026735 | 6.9e-34 | 149 |
| rs4802082 | T | C | 0.046961 | 0.046837 | 2.62e-27 | 115 |
| rs4803356 | G | C | 0.057548 | 0.042994 | 2.62e-33 | 146 |
| rs4803408 | T | C | 0.016753 | 0.087059 | 9.55e-13 | 63 |
| rs530366 | G | A | 0.170702 | 0.026673 | 2.27e-10 | 39 |
| rs55978439 | A | T | 0.208258 | 0.024937 | 6.62e-57 | 266 |
| rs56113850 | C | T | 0.552548 | 0.019773 | 5.54e-261 | 1457 |
| rs56185718 | C | T | 0.267062 | 0.022731 | 6.57e-36 | 159 |
| rs62107913 | T | C | 0.220432 | 0.023608 | 6.59e-23 | 92 |
| rs62117431 | G | A | 0.072323 | 0.055831 | 7.26e-11 | 88 |
| rs6413474 | C | T | 0.021795 | 0.082359 | 9.81e-16 | 92 |
| rs68191109 | C | T | 0.395548 | 0.022225 | 1.88e-08 | 37 |
| rs71358941 | G | C | 0.045601 | 0.050249 | 3.71e-10 | 42 |
| rs7257854 | C | T | 0.379552 | 0.020238 | 2.02e-64 | 286 |
| rs73045487 | C | G | 0.169429 | 0.026378 | 4.38e-19 | 77 |
| rs73048936 | G | A | 0.039663 | 0.063135 | 2.28e-08 | 47 |
| rs74429191 | C | T | 0.048082 | 0.056616 | 7.58e-10 | 55 |
| rs74723889 | T | C | 0.028486 | 0.092862 | 1.74e-11 | 108 |
| rs75762823 | T | C | 0.053053 | 0.054094 | 1.31e-08 | 47 |
| rs78148277 | A | G | 0.027775 | 0.061826 | 1.12e-14 | 61 |
| rs7937 | T | C | 0.596432 | 0.019807 | 6.65e-82 | 363 |
| rs8107329 | T | C | 0.363641 | 0.021918 | 8.89e-27 | 128 |
| rs8113056 | A | G | 0.209292 | 0.024115 | 7.81e-37 | 156 |

**Supplementary Table 3.** Egger regression and MR-PRESSO analyses for horizontal pleiotropy

| Dataset | Egger-intercept | Egger-SE | Egger P-value | MR-PRESSO Global Test |
| --- | --- | --- | --- | --- |
| FINN_COPD | -0.0024 | 0.0044 | 0.58 | 0.18 |
| MVP_COPD | -0.0045 | 0.0028 | 0.12 | 0.79 |

**Supplementary Table 4.** Details of the reverse Mendelian Randomization (MR)

| Datasets | IV Thresholds | Methods | IVs | P-value |
| --- | --- | --- | --- | --- |
| FINN_COPD | 5×10-8 | Inverse variance weighted | 44 | 0.709 |
|  |  | Maximum likelihood |  | 0.702 |
|  |  | MR-Egger |  | 0.542 |
|  |  | MR-RAPS |  | 0.809 |
|  |  | MR-PRESSO |  | 0.892 |
| MVP_COPD | 5×10-8 | Inverse variance weighted | 169 | 0.151 |
|  |  | Maximum likelihood |  | 0.027 |
|  |  | MR-Egger |  | 0.110 |
|  |  | MR-RAPS |  | 0.425 |
|  |  | MR-PRESSO |  | 0.272 |

**Supplementary Table 5.** Stratified Mendelian Randomization Estimates for Early- and Later-Onset COPD

| Methods | FINN_EARLY_COPD | | | FINN_LATER_COPD | | |
| --- | --- | --- | --- | --- | --- | --- |
| IVs | OR (95%CI) | P-value | IVs | OR (95%CI) | P-value |
| Inverse variance weighted | 69 | 1.118(1.099,1.136) | ＜0.001 | 60 | 1.026(1.009,1.042) | 0.001 |
| Maximum likelihood |  | 1.122(1.103,1.143) | ＜0.001 |  | 1.025(1.010,1.041) | 0.001 |
| MR-Egger |  | 1.118(1.099,1.137) | ＜0.001 |  | 1.031(0.997,1.067) | 0.081 |
| MR-RAPS |  | 1.118(1.100,1.136) | ＜0.001 |  | 1.025(1.009,1.042) | ＜0.001 |
| MR-PRESSO |  | 1.138(1.097,1.180) | ＜0.001 |  | 1.025(1.011,1.040) | ＜0.001 |

**Supplementary Table 6.** Egger regression and MR-PRESSO analyses for horizontal pleiotropy for Early-and Later-Onset COPD

| Dataset | Egger-intercept | Egger-SE | Egger P-value | MR-PRESSO Global Test |
| --- | --- | --- | --- | --- |
| FINN_EARLY | -0.0064 | 0.0059 | 0.28 | 0.59 |
| FINN_LATER | -0.0019 | 0.0054 | 0.73 | 0.90 |

**Supplementary Table 7.** Results of colocalization analysis showing evidence for shared causal variants (PPH₄) in the main analysis.

| Dataset | nSNPs | PP.H0.abf | PP.H1.abf | PP.H2.abf | PP.H3.abf | PP.H4.abf | SNP | Located_Gene |
| --- | --- | --- | --- | --- | --- | --- | --- | --- |
| FINN_COPD | 2406 | 2.549E-92 | 2.038E-03 | 7.989E-91 | 6.295E-02 | 9.350E-01 | rs8102683 | EGLN2(downstream), CYP2A6(upstream) |
| MVP_COPD | 1235 | 7.670E-259 | 2.590E-09 | 4.043E-251 | 1.357E-01 | 8.643E-01 | rs56113850 | CYP2A6 |
|  | 1408 | 3.444E-95 | 2.935E-06 | 6.383E-92 | 4.444E-03 | 9.956E-01 | rs12610432 | EGLN2(downstream), CYP2A6(upstream) |
|  | 1202 | 6.573E-76 | 2.793E-02 | 3.361E-76 | 1.332E-02 | 9.588E-01 | rs7937 | RAB4B-EGLN2 |

**Supplementary Figure 1.** Mendelian randomization scatter plots of SNP-specific associations with NMR and COPD. Note: (A) FinnGen dataset (B) MVP dataset


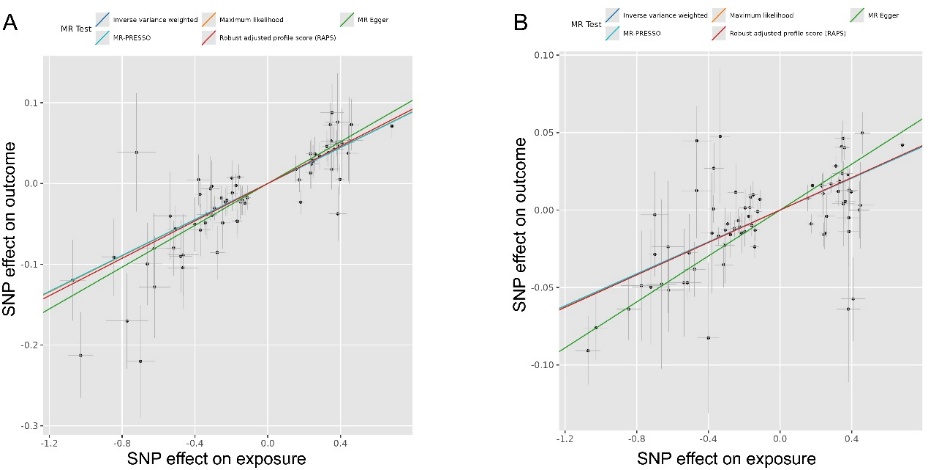


**Supplementary Figure 2.** Forest plot of single-nucleotide polymorphisms (SNPs) associated with NMR and risk of FINN_COPD.


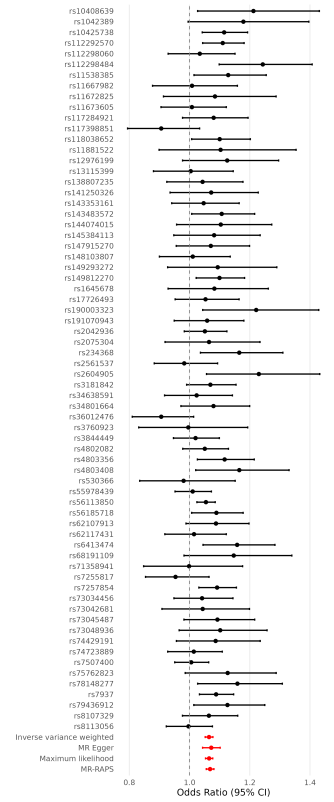


**Supplementary Figure 3.** Forest plot of single-nucleotide polymorphisms (SNPs) associated with NMR and risk of MVP_COPD.


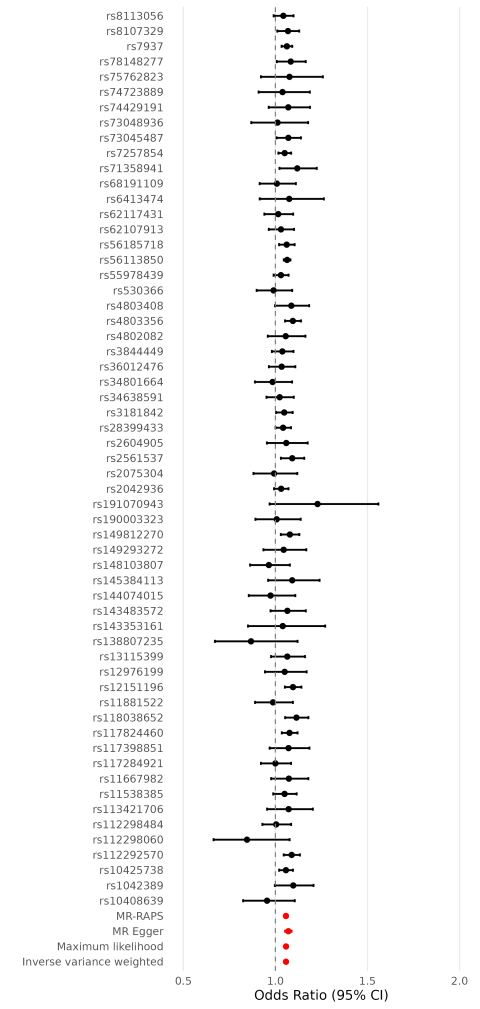


**Supplementary Figure 4.** Leave-one-out analysis plot of inverse-variance weighted two-sample Mendelian randomization between NMR and FINN_COPD.


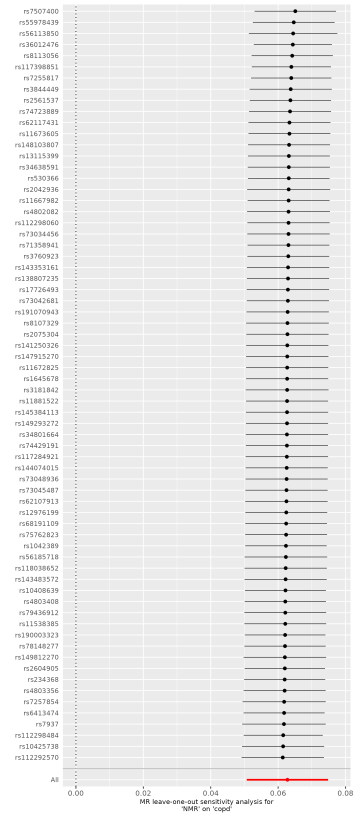


**Supplementary Figure 5.** Leave-one-out analysis plot of inverse-variance weighted two-sample Mendelian randomization between NMR and MVP_COPD.


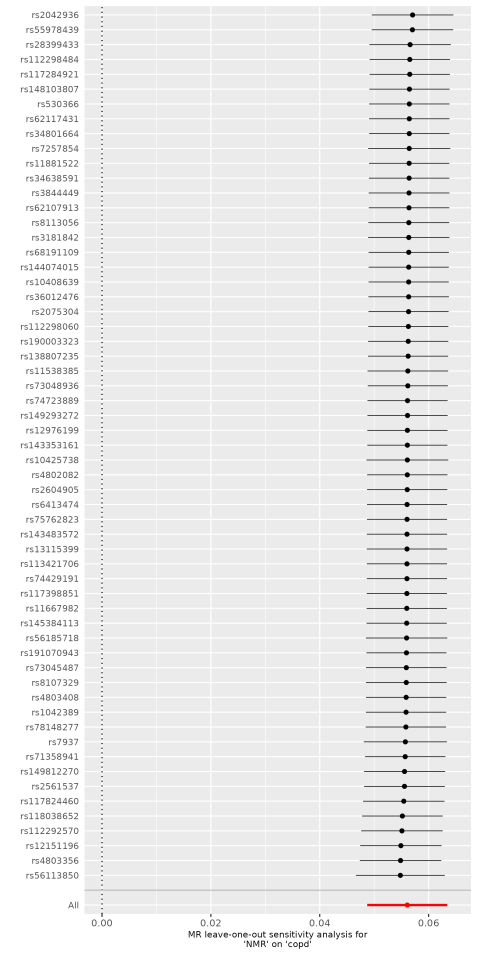


**Supplementary Figure 6.** Funnel plot from single SNP analysis of the two-sample Mendelian Randomization (MR). Note: (A) FinnGen dataset (B) MVP dataset


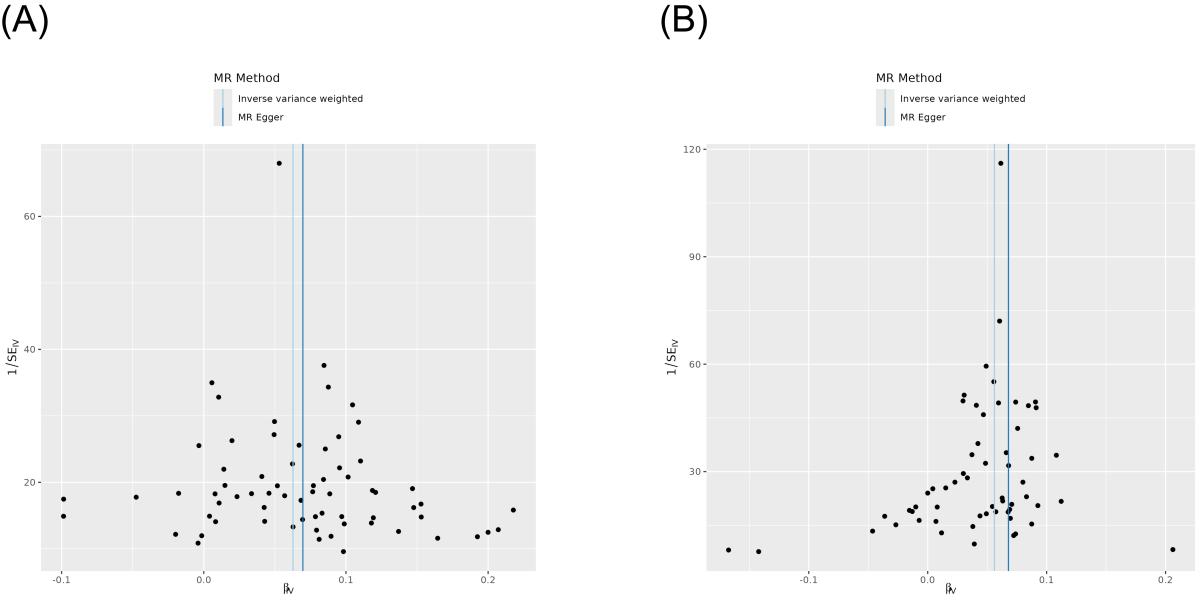


**Supplementary Figure 7.** Colocalization analysis of NMR and COPD.

Note: Colocalization plots for the CYP2A6–EGLN2 locus across multiple COPD GWAS datasets, highlighting lead SNPs (rs8102683, rs7937, rs56113850, and rs12610432) with high posterior probability of colocalization (PPH4). (A) FinnGen dataset; (B-D) MVP dataset.


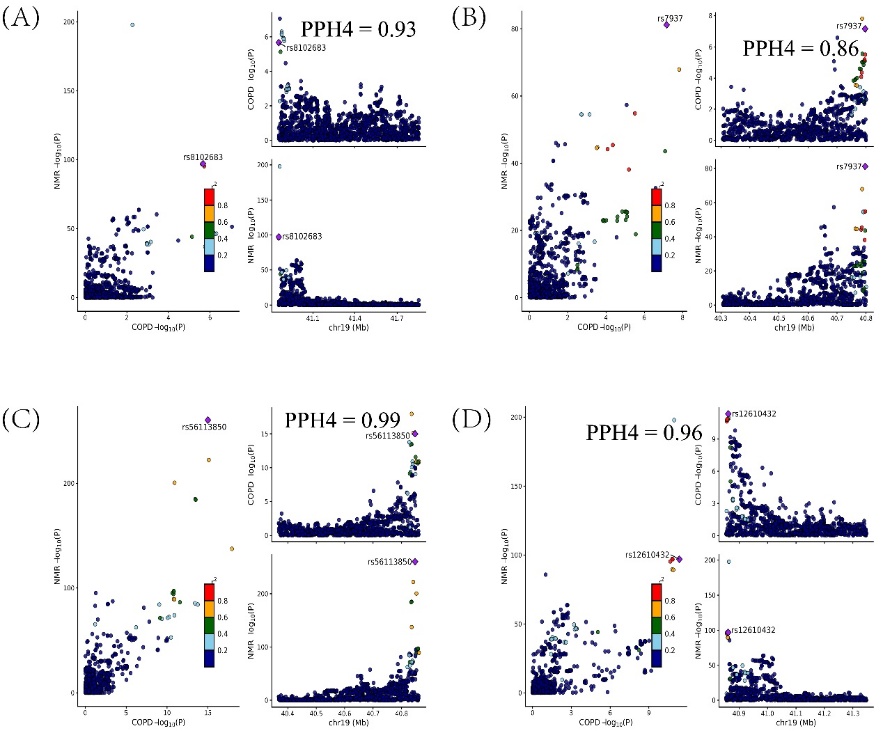


**Supplementary Figure 8.** Trends in COPD prevalence across equivalent levels of smoking exposure by nicotine metabolism phenotype.


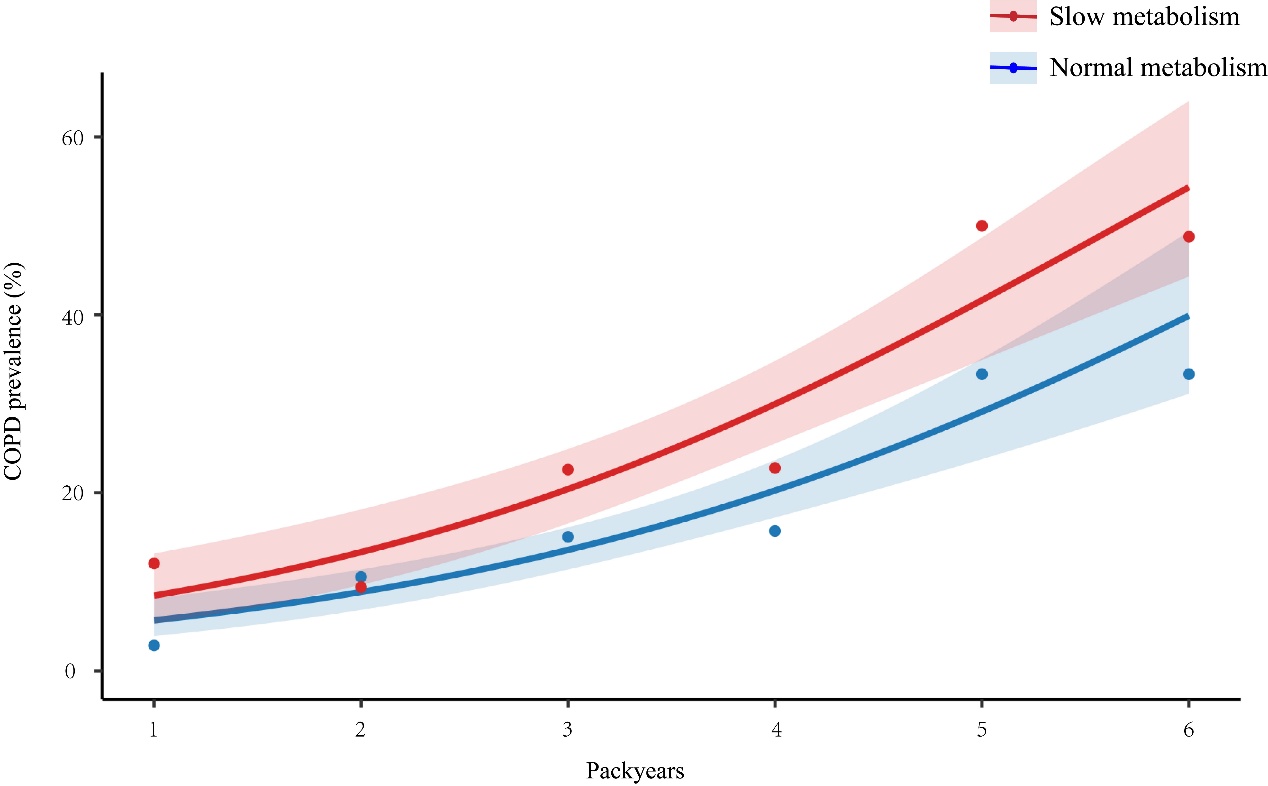

Supplement: Supplementary file 1 [file 594021%20Revised%20Appendix.docx]
